# Supplementary material for: Luminescent nanobeads: attachment of surface reactive Eu(iii) complexes to gold nanoparticles
Source: Royal Society of Chemistry journal article supplement (doi:10.1039/b518091k), 2006-01-01

## Supporting Information

David J. Lewis,<sup>†</sup> Thomas M. Day,<sup>‡</sup> Julie V. MacPherson,<sup>‡</sup> and Zoe Pikramenou<sup>\*†</sup>.

<sup>†</sup>School of Chemistry, University of Birmingham, Edgbaston, B15 2TT, UK

<sup>‡</sup>Department of Chemistry, University of Warwick, Coventry, CV4 7AL, UK

### S1.0 Experimental

#### S1.1. 1, 11-(bis(4-amidothiophenol)-1, 11-dioxo-3, 6, 9-triaza-3,6,9-triscarboxymethyl)undecane: **H<sub>3</sub>L**

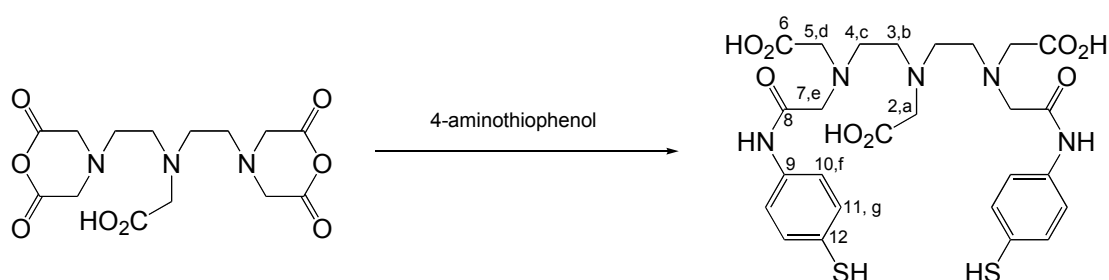

**H<sub>3</sub>L** was prepared by adding 4-aminothiophenol (2.0 g, 16.0 mmol) to a stirring suspension of ca.DTPA (1.02 g, 2.8 mmol) in pyridine (10 ml) following the procedure of Konings et al (*Inorg. Chem.*, 1990, **29**, 1488) and affording **H<sub>3</sub>L** as a white powder (0.67 g, 40 %). <sup>1</sup>H NMR (300 MHz, *d*<sub>4</sub>-MeOH), δ ppm: 7.4 (4H, d, <sup>3</sup>*J* = 8.6 Hz, ArH<sub>g</sub>); 7.1 (4H, d, <sup>3</sup>*J* = 8.6 Hz, ArH<sub>f</sub>); 4.12 (2H, s, H<sub>a</sub>); 3.62 (4H, s, H<sub>d</sub>); 3.59 (4H, s, H<sub>e</sub>); 3.49 (4H, t, <sup>3</sup>*J* = 5.2 Hz, H<sub>c</sub>); 3.22 (4H, t, <sup>3</sup>*J* = 5.2 Hz, H<sub>b</sub>). <sup>13</sup>C PENDANT {<sup>1</sup>H} NMR (75 MHz, *d*<sub>4</sub>-MeOH), δ ppm: 173, 170, 168 (CO<sub>2</sub>H, C<sub>1,6</sub>; CONH, C<sub>8</sub>); 135 (ArCNHCO, C<sub>9</sub>); 130 (ArCH, C<sub>10</sub>); 126 (ArCSH, C<sub>12</sub>); 121 (ArCH, C<sub>11</sub>); 59.2 (CH<sub>2</sub>, C<sub>5</sub>), 56.3 (CH<sub>2</sub>, C<sub>7</sub>), 55.5 (CH<sub>2</sub>, C<sub>2</sub>), 55.0 (CH<sub>2</sub>, C<sub>4</sub>), 51.2 (CH<sub>2</sub>, C<sub>3</sub>). MS (ES<sup>+</sup>) *m/z*: 608 {M+H}<sup>+</sup>. Anal. calc. for C<sub>26</sub>H<sub>41</sub>N<sub>5</sub>O<sub>12</sub>S<sub>2</sub>Cl<sub>3</sub>(NH<sub>4</sub>Cl)<sub>0.5</sub>: C, 32.6; H, 4.5; N, 8.1. Found: C, 32.3; H, 4.2; N, 8.0. UV-Vis (MeOH) λ<sub>max</sub> in nm (log ε) 265 (4.5).

### S1.2. Preparation of EuL via K<sub>3</sub>L

**H<sub>3</sub>L** (0.20 g, 0.33 mmol) was dissolved in degassed methanol (5 ml). To the stirred solution, KOH (0.055 g, 0.99 mmol) was added as a methanolic solution (5 ml) and the mixture stirred for 10 minutes. The methanol was then completely evaporated to yield the tripotassium salt, **K<sub>3</sub>L** in the reaction vessel, which was redissolved in degassed deionised water (5 ml). To the aqueous solution, EuCl<sub>3</sub>·6H<sub>2</sub>O (0.12 g, 0.33 mmol) was added which caused an immediate precipitation of a white solid, which was isolated by suction filtration and washed with acetone (2 × 10 ml) and diethyl ether (5 ml), and dried under vacuum to yield the complex, **EuL** (0.21 g, 86 %). MS (ES<sup>+</sup>): m/z 758 {M+H}<sup>+</sup>. HRMS calc. for EuC<sub>26</sub>H<sub>31</sub>N<sub>5</sub>O<sub>8</sub>S<sub>2</sub>: 758.0826. Found: 758.0833. UV-Vis (MeOH): λ<sub>max</sub> in nm (log ε) 266 (4.4).

### S1.3. Preparation of Gold Colloids

Gold colloids were prepared as per Grabar *et. al* (*Anal. Chem.*, 1995, **67**, 735).

### S.1.4. Calculation of Nanoparticle Concentration

It was possible to estimate the concentration of CNPs from TEM experiments. It can be assumed (R. L. Johnston, 'Atomic and Molecular Clusters', Taylor & Francis, **2002**) for large “spherical” metal clusters such as a gold nanoparticle that:

$$V_{\text{cluster}} = NV_{\text{atom}} \quad (\text{eq. 1})$$

$$\frac{4}{3} \pi (R_{\text{cluster}})^3 = N \frac{4}{3} \pi (R_{\text{atom}})^3 \quad (\text{eq. 2})$$

Where V is the cluster or atom volume, R is the cluster or atomic radius and N is the total number of atoms within the cluster. Rearranging, we obtain:

$$R_{\text{cluster}} = N^{1/3} R_{\text{atom}} \quad (\text{eq. 3})$$

Knowing the cluster radius we may also calculate the surface (S) area of a nanoparticle with the following equation:

$$S_{\text{cluster}} = 4 \pi (R_{\text{cluster}})^2 \quad (\text{eq. 4})$$

For larger clusters, we may also calculate the number of surface atoms,  $N_s$ , directly by dividing the surface area of the cluster by the cross section of an individual cluster atom, and then simplifying using the relationship in (eq. 3):

$$N_s = (4 \pi (R_{\text{cluster}})^2) / (\pi (R_{\text{atom}})^2) = 4 N^{2/3} \quad (\text{eq. 5})$$

From the TEM result we know that  $R_{\text{cluster}} \approx 6.5 \text{ nm}$ , and  $R_{\text{atom}} = 0.137 \text{ nm}$ . The number of gold atoms per nanoparticle was estimated using (eq. 3):

$$N = (R_{\text{cluster}} / R_{\text{atom}})^3 = ((6.5 \times 10^{-9}) / (137 \times 10^{-9}))^3$$

$$N = \underline{106\ 801} \text{ gold atoms per nanoparticle}$$

The number of surface atoms,  $N_s$ , on a single gold nanoparticle was also estimated using (eq. 5):

$$N_s = 4 N^{2/3} = 4 \times (106, 801)^{2/3}$$

$$N_s = \underline{9004} \text{ gold surface atoms per nanoparticle}$$

From the calculation of N, the molecular weight ( $M_w$ ) of a single nanoparticle was calculated using the relative molecular mass of a single gold atom ( $M_{\text{gold}}$ ):

$$M_w = M_{\text{gold}} \times N$$

$$M_w = 196.97 \times 106\,801$$

$$M_w = \underline{21\,036 \text{ kDa}}$$

Calculation of the amount of nanoparticles formed ( $N_{\text{NP}}$ ) when 1 dm<sup>3</sup> of 1 mM HAuCl<sub>4</sub> is reduced by citrate was then calculated:

$$\text{Moles of HAuCl}_4 = 1 \times 1 \times 10^{-3} = 1 \times 10^{-3} \text{ mol}$$

$$\begin{aligned} \text{No. of gold atoms, } N_{\text{atom}} &= 1 \times 10^{-3} \times N_A = 1 \times 10^{-3} \times 6.022 \times 10^{23} \\ &= 6.022 \times 10^{20} \end{aligned}$$

$$N_{\text{NP}} = N_{\text{atom}} / N$$

$$N_{\text{NP}} = (6.022 \times 10^{20}) / (106\,801)$$

$$N_{\text{NP}} = \underline{5.639 \times 10^{15}} \text{ Nanoparticles formed per } 1 \times 10^{-3} \text{ mol HAuCl}_4$$

Hence the final concentration of the gold colloid,  $C_{\text{NP}}$ , was estimated by dividing  $N_{\text{NP}}$  by Avagadro's number ( $N_A$ ):

$$C_{\text{NP}} = N_{\text{NP}} / N_A$$

$$C_{\text{NP}} = (5.639 \times 10^{15}) / (6.022 \times 10^{23})$$

$$C_{\text{NP}} = \underline{9.363 \times 10^{-9} \text{ mol dm}^{-3}}$$

## S2.0 Additional Spectra

**Figure S2.1.:** 300 MHz  $^1\text{H}$  NMR spectrum of  $\text{H}_3^1$  ( $d_4$ -MeOH)

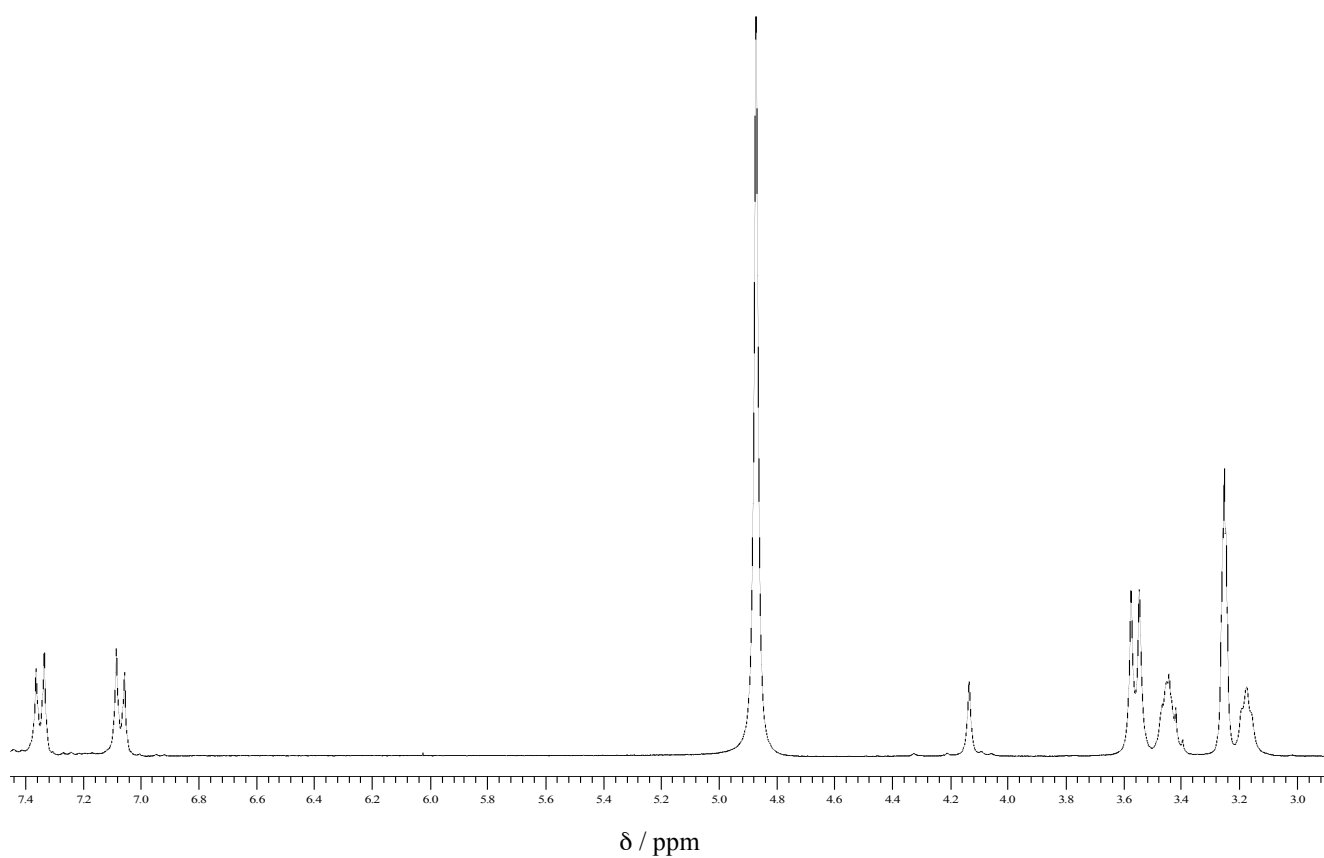

**Figure S2.2. :** 75 MHz  $^{13}\text{C}$   $\{^1\text{H}\}$  PENDANT NMR spectrum of  $\text{H}_3\text{L}$  ( $d_4$ -MeOH)

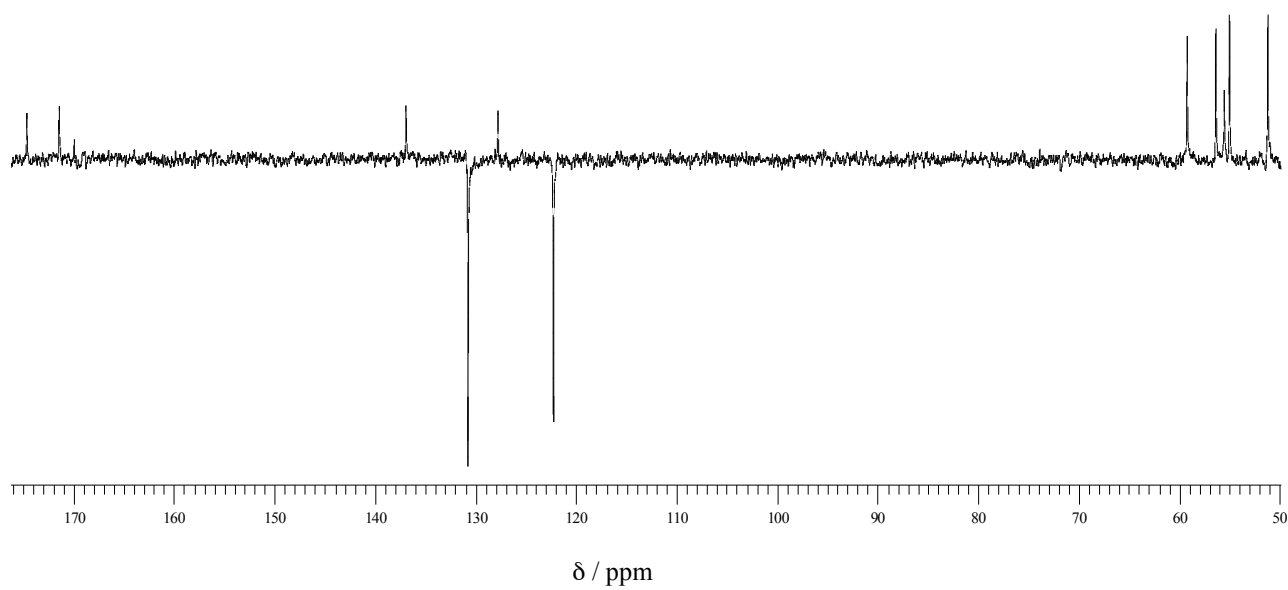

**Figure S2.3.** : UV-vis absorption spectrum of 0.2 nM aqueous citrate-stabilised Au colloid (solid curve), and after addition of 125 nmol of **TbX** (dashed curve).

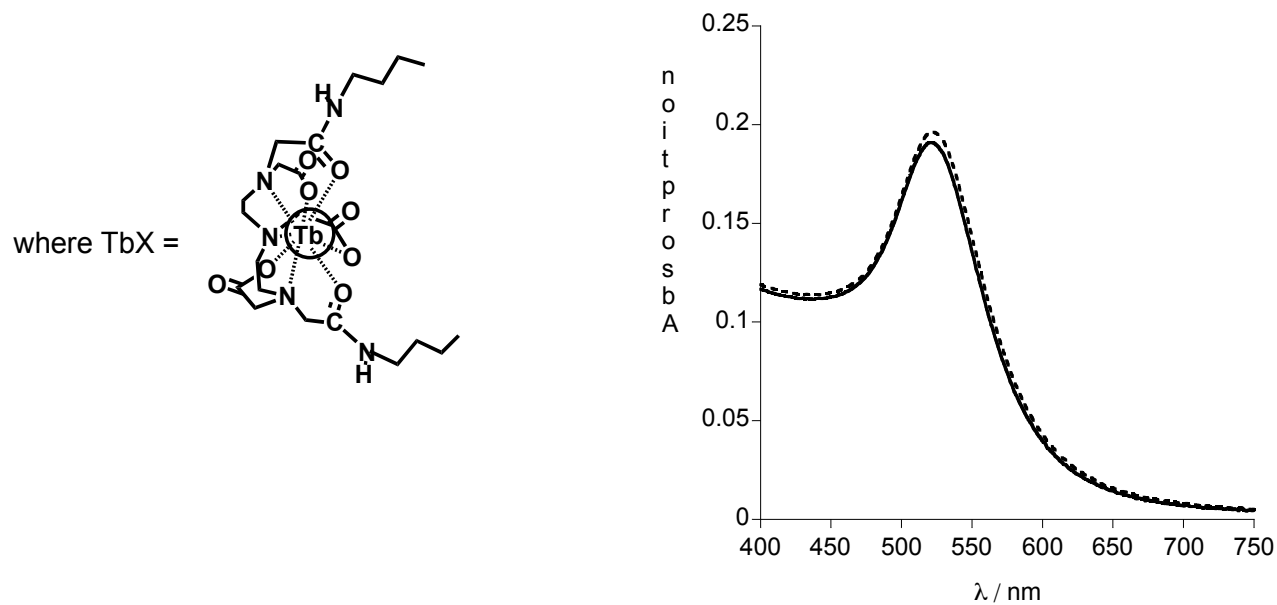

**Figure S2.4.** : UV-vis absorption spectrum of 0.2 nM citrate stabilised gold colloid (2.5 ml) (solid line with cross) , after addition of 175  $\mu$ l methanol (solid line).

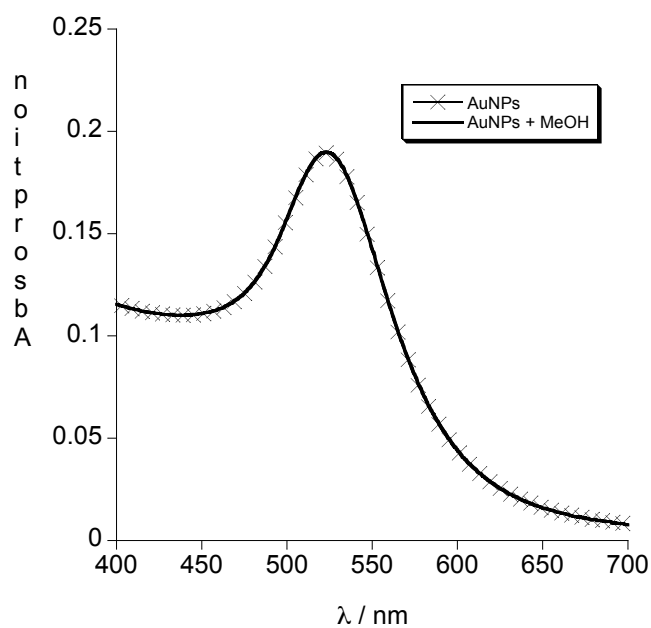

**Figure S2.5.** : UV-vis spectrum of nanoparticles functionalised with **EuL** after gel filtration chromatography on Sephadex G-15.

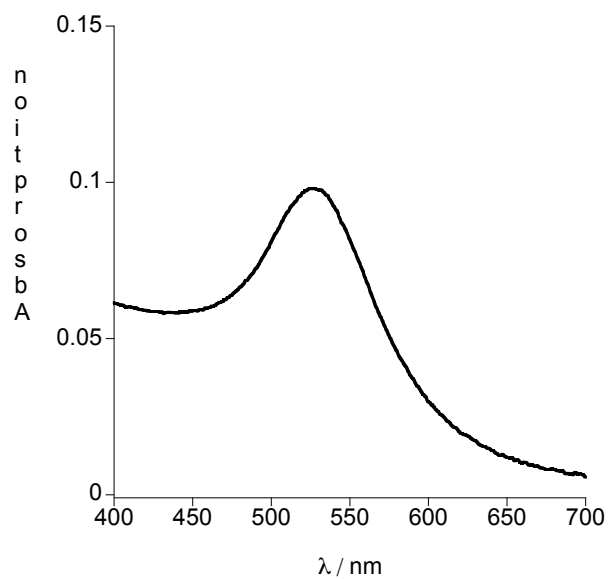

Supplement: b518091k.pdf [file b518091k.pdf]
